# 1 **Genome-wide maps of distal gene regulatory regions active in the** 2 **human placenta**

3  
4 Joanna Zhang<sup>1¶</sup>, Corinne N. Simonti<sup>2¶</sup>, John A. Capra<sup>1,2\*</sup>

5 <sup>1</sup> *Department of Biological Sciences, Vanderbilt University, Nashville, TN, USA*

6 <sup>2</sup> *Vanderbilt Genetics Institute, Vanderbilt University, Nashville, TN, USA*

7

8 \* Corresponding author: [tony.capra@vanderbilt.edu](mailto:tony.capra@vanderbilt.edu)

9

10 ¶ Co-first authors

11

12

## 13 **ABSTRACT**

14

15 Placental dysfunction is implicated in many pregnancy complications, including preeclampsia and  
16 preterm birth (PTB). While both these syndromes are influenced by environmental risk factors, they also  
17 have a substantial genetic component that is not well understood. Precisely controlled gene expression  
18 during development is crucial to proper placental function and often mediated through gene regulatory  
19 enhancers. However, we lack accurate maps of placental enhancer activity due to the challenges of  
20 assaying the placenta and the difficulty of comprehensively identifying enhancers. To address the gap in  
21 our knowledge of gene regulatory elements in the placenta, we used a two-step machine learning pipeline  
22 to synthesize existing functional genomics studies, transcription factor (TF) binding patterns, and  
23 evolutionary information to predict placental enhancers. The trained classifiers accurately distinguish  
24 enhancers from the genomic background and placental enhancers from enhancers active in other tissues.  
25 Genomic features collected from tissues and cell lines involved in pregnancy are the most predictive of  
26 placental regulatory activity. Applying the classifiers genome-wide enabled us to create a map of 33,010  
27 predicted placental enhancers, including 4,562 high-confidence enhancer predictions. The genome-wide  
28 placental enhancers are significantly enriched nearby genes associated with placental development and  
29 birth disorders and for SNPs associated with gestational age. These genome-wide predicted placental  
30 enhancers provide candidate regions for further testing in vitro, will assist in guiding future studies of  
31 genetic associations with pregnancy phenotypes, and aid interpretation of potential mechanisms of action  
32 for variants found through genetic studies.

33

34

## 35 INTRODUCTION

36 The placenta is a complex temporary organ, essential for successful pregnancy. The placenta performs  
37 many vital functions including transfer of nutrients to the developing fetus and protection against  
38 infectious agents [1]. Placental dysfunction has been connected to pregnancy complications, such as  
39 preeclampsia and preterm birth (PTB) [2–5]. PTB and preeclampsia both have environmental risk factors  
40 as well as a genetic component that is not well understood. Family and pedigree studies of PTB and  
41 preeclampsia suggest strong genetic components, but heritability estimates for both vary considerably  
42 [5,6], and genetic associations found through genome-wide association studies (GWAS) of these and  
43 other disorders of pregnancy have been difficult to regulate [7,8]. Though a recent study of more than  
44 43,000 women has identified and replicated several loci associated with gestational duration and preterm  
45 birth [9].

46 Precisely controlled gene expression during pregnancy is crucial to proper development, and  
47 these gene regulatory “programs” are mediated by enhancers, gene regulatory elements that play a large  
48 role in development and thus disease [10–12]. Disruption of enhancers and gene regulation have been  
49 shown to influence risk for many complex diseases [10,13]. Thus, mapping the enhancer landscape is a  
50 common step in the search for and interpretation of genetic associations. As is common for complex  
51 diseases, the genetic variants that have been implicated in PTB risk by GWAS are non-coding and thus  
52 difficult to interpret. Typical enhancer identification methods are impractical in early placental stages for  
53 many reasons, but perhaps most importantly because sampling the placenta increases risk of pregnancy  
54 loss [14]. *In vivo* studies in model organisms have lent insight to early placental development, but the  
55 rapid evolution of pregnancy across taxa often limits the translatability of this work [15].

56 To address the challenge of mapping gene regulatory elements active in the placenta, we used the  
57 EnhancerFinder [16] machine learning approach to predict placental enhancers. Using computational  
58 methods to synthesize existing functional studies, transcription factor (TF) binding, and evolutionary  
59 information to identify enhancers avoids many of the difficulties of studying the placenta discussed above.  
60 Indeed, such methods have historically been successful in identifying and interpreting regulatory regions  
61 [16–18]. We present a set of 4,562 placental enhancers predicted genome-wide. These putative enhancers  
62 show clear relevance to placental biology; they are located near many genes involved in placental  
63 function and development and are significantly enriched for genetic variants associated with pregnancy  
64 phenotypes and complications. These predicted enhancers provide candidate regions for researchers to  
65 test *in vitro*, and propose mechanisms of action for variants found through GWAS. To facilitate their use,  
66 all the enhancer predictions are integrated into GENEStATION (v2.0) [19].  
67  
68

## 69 RESULTS

### 70 A two-step machine-learning framework for placental enhancer prediction

71 To predict placental enhancers, we used the EnhancerFinder algorithm, which integrates sequence,  
72 evolutionary, and functional properties of known enhancers to build statistical models that enable the  
73 identification of new enhancers [16]. This approach proceeds in two steps. First, a model is built to  
74 distinguish known enhancers active in any cellular context from regions from the genomic background  
75 (Step 1). Then, models for classifying enhancers active in particular tissues are trained by comparing  
76 enhancers active in a tissue of interest to enhancers only active in other tissues (Step 2). This two-step  
77 approach yields more specific predictions than a single step approach [16].

78 We trained our classifiers using enhancers defined by cap analysis of gene expression (CAGE)  
79 from the FANTOM5 Transcribed Enhancer Atlas [20]. Analyzing 411 different tissues and cell lines, they  
80 identified 38,538 robust human enhancers, of which 748 were active in the human placenta. We  
81 characterized each enhancer by its DNA sequence properties, evolutionary conservation, and chromatin  
82 state. Each region's DNA sequence composition was quantified by counting the occurrence of all five-  
83 nucleotide-long (5-mer) DNA sequences within the region. Evolutionary conservation was quantified  
84 using mammalian conserved elements from phastCons [21]. Finally, we used functional genomics data  
85 from the Roadmap Epigenomics Project [22], including histone modifications and DNaseI  
86 hypersensitivity data from hundreds of cellular contexts, to quantify the chromatin state of the region.  
87 (See the Methods for a complete description of the features.)

88 Then, using these features, we trained a multi-kernel support vector machine (SVM) classifier—  
89 with one kernel for each of the three data types—to distinguish robust enhancers from random, length-  
90 matched non-enhancer regions from the genomic background (Fig 1; Step 1). For Step 2, we trained a  
91 placental enhancer classifier using the 748 known placental enhancers as positives and a random subset of  
92 2,000 robust non-placental enhancers as the negatives (Fig 1).

93

94 **Fig 1. Schematic of the placental enhancer prediction pipeline.** First, we associated known enhancers  
95 from diverse tissues (+) and non-enhancer regions from the genomic background (–) with a range of  
96 informative features including their DNA sequence patterns, functional genomics data, and evolutionary  
97 conservation across species. Second, we trained a multi-kernel support vector machine to distinguish the  
98 enhancers from regions without enhancer activity using the associated features. We evaluated the  
99 performance of trained classifiers using 10-fold cross validation. Finally, we applied a classifier trained to  
100 distinguish enhancers from non-enhancers to all sequences in the human genome (Step 1). Then we  
101 applied a second classifier trained to distinguish placental enhancers from enhancers active in other  
102 tissues (Step 2). This produced an accurate set of genome-wide placental enhancer predictions.

103

#### 104 **Accurate prediction of known placental enhancers**

105 To assess the performance of our trained classifiers, we used 10-fold cross validation to compute average  
106 receiver operating characteristic (ROC) curve and precision-recall (PR) curves. In 10-fold cross validation,  
107 ten models are trained using a different 90% of the positive and negative training regions, and then each  
108 model is evaluated on remaining 10% of the regions. We quantified our method's overall performance by  
109 the average area under the curve (AUC) over the 10 runs.

110 The trained Step 1 classifier performs very well at identifying FANTOM enhancers from  
111 genomic background (Fig 2A; ROC AUC=0.93, PR AUC=0.78). The classifier trained to distinguish  
112 placental enhancers from enhancers active in other contexts (Step 2) also has strong performance (Fig 2B;  
113 ROC AUC=0.84, PR AUC=0.70). While distinguishing enhancers active in the placenta from enhancers  
114 active in other tissues is more challenging than generally distinguishing enhancers from the genomic  
115 background, our approach still performs well at this task.

116

117

118

119

120

121 **Fig 2. The trained classifiers accurately identify placental enhancers.** Receiver operating  
122 characteristic (ROC) curves for the classifiers trained to distinguish enhancers from non-enhancers (A,  
123 Step 1) and placental enhancers from enhancers active in other tissues (B, Step 2). Both perform  
124 significantly better than expected by chance with areas under the ROC curve (AUC) of 0.93 and 0.84  
125 respectively. The shaded region represents the performance range observed over the 10 cross validation  
126 runs. The diagonal line represents chance performance. The corresponding Precision-Recall curve AUCs  
127 are 0.78 and 0.70, respectively.

128

### 129 **Functional genomics data from pregnancy-related tissues are the most informative for** 130 **distinguishing placental enhancers from other enhancers**

131 To investigate the genomic attributes most useful to the placental enhancer classifier, we examined the  
132 individual feature weights the algorithm assigned in the functional genomics kernel after Step 2 training.  
133 A positive feature weight indicates association with placental enhancer activity, while a negative feature  
134 weight is associated with enhancer activity in another context. The most informative contexts (i.e., the  
135 contexts whose histone modification features had the largest absolute weights) within the kernel were  
136 from placental and related tissues (trophoblast cells, amnion, and endometrial stromal cells), and the least  
137 informative features came from cellular contexts unrelated to pregnancy (Fig 3).

138

139 **Fig 3. Functional genomics data from pregnancy-related tissues are highly weighted by the**  
140 **placental enhancer classifier.** The absolute value of the weight assigned to each functional genomics  
141 feature in the SVM is plotted (positive weight: blue, negative weight: white, mean of absolute weights:  
142 black X). The absolute weights on the functional genomics features from the other 117 contexts were  
143 collapsed into one box plot (outliers are plotted as gray diamonds).

144

### 145 **A genome-wide map of regions with potential placental regulatory activity**

146 To identify genomic regions with potential placental regulatory activity genome-wide, we applied our  
147 trained classifiers to the human genome by tiling all human chromosomes into regions the length of an  
148 average FANTOM5 placental enhancer (400 bp) overlapping by 200 bp. We filtered out tiles that  
149 overlapped gaps in the genome assembly, exons, and likely promoter regions (5 kb region upstream of  
150 each transcription start site). Tiles assigned to both the enhancer and placental enhancer by the SVM  
151 classifiers were considered putative placental enhancer. Those with strong predictions in both classifiers  
152 (SVM score > 1) were considered high confidence putative placental enhancers. Merging overlapping  
153 tiles yielded 4,562 high-confidence placental enhancers, covering 3,475,438 bp of the genome, and  
154 33,010 putative enhancers, covering 38,893,990 bp of the genome (Table 1).

155

156

157 **Fig 4. High-confidence predicted placental enhancers are found across the human genome.** The  
158 black lines indicate the locations of a high-confidence predicted placental enhancer on the human  
159 chromosomes. We predicted 4,562 high confidence placental enhancers and 33,010 potential placental  
160 enhancers (Supplementary Files 1 and 2).

161

162

163

164

165 **Table 1.** Statistical summary of genome-wide placental enhancer predictions.

| Enhancer set                        | Count  | Mean length (bp) | Genome Coverage (bp) |
|-------------------------------------|--------|------------------|----------------------|
| High Confidence Placental Enhancers | 4,562  | 762              | 3,475,438            |
| Potential Placental Enhancers       | 33,010 | 846              | 38,893,990           |

166

167

168 **Predicted placental enhancers are enriched near genes with placental functions**

169 To evaluate the relevance of our high-confidence predicted placental enhancers to placental biology and  
 170 pregnancy, we examined nearby genes in the context of known gene annotations. Using the functional  
 171 enrichment analysis tool GREAT [23], we mapped each region to putative gene targets and then tested for  
 172 the enrichment of relevant Gene Ontology (GO) functional annotations. We found significant enrichment  
 173 for many relevant terms such as “placenta development” and “decreased placental labyrinth size”  
 174 (selected terms: Table 2, full list: Supplementary Table 1).

175

176 **Table 2.** Placenta-relevant functions significantly enriched among genes near high-confidence predicted  
 177 placental enhancers. GO BP = Gene Ontology Biological Process.

| Ontology         | Term                                   | Binomial Fold Enrichment | Binomial FDR Q-value |
|------------------|----------------------------------------|--------------------------|----------------------|
| GO BP            | Placenta development                   | 2.0                      | 6.6e-13              |
| GO BP            | Embryonic placenta development         | 2.2                      | 1.0e-12              |
| Mouse Phenotype  | Decreased placental labyrinth size     | 4.8                      | 2.9e-33              |
| Mouse Phenotype  | Abnormal placenta labyrinth morphology | 2.4                      | 1.5e-28              |
| MGI Expression   | TS4 Zona Pellucida                     | 2.1                      | 3.9e-64              |
| Disease Ontology | Neoplasm of body of uterus             | 2.7                      | 3.5e-24              |
| Disease Ontology | Persistent fetal circulation syndrome  | 4.8                      | 1.7e-06              |
| Disease Ontology | Newborn respiratory distress syndrome  | 2.6                      | 3.2e-06              |

178

179

180 **Predicted placental enhancers are enriched for regions associated with gestational age and preterm  
 181 birth**

182 To assess the biological importance of our high-confidence placental enhancers, we tested for enrichment  
 183 of regions associated with gestational age and preterm birth in a recent genome-wide association study  
 184 (GWAS) [9]. Forty-three of our predicted enhancers overlapped 12 out of 14 GWAS regions. To  
 185 interpret this, we compared the observed overlap to the number of overlaps found for 10,000 randomly  
 186 generated sets of genomic regions length- and chromosome-matched to our predictions and excluding  
 187 genomic gaps. Our putative enhancers were significantly enriched for relevant GWAS catalogued regions  
 188 associated with preterm birth and gestational age ( $P < 0.0001$ ) with a calculated fold enrichment of 2.69  
 189 (relative to the mean of the randomized sets).

190

191 To compare the high-confidence placental enhancer set to the candidate placental enhancer set,  
 we tested the enrichment for specific functions near the candidate regions using GREAT and for overlap

192 with the pregnancy-related GWAS regions. We found similar placenta-related GO terms enriched near the  
193 larger candidate placental enhancer set, for example: with GO terms such as “placenta development” ( $P =$   
194  $3.80e-147$ ) and “embryonic placenta development” ( $P = 3.82e-99$ ). The candidate enhancers were also  
195 enriched for GWAS regions associated with preterm birth and gestational age (relative fold enrichment:  
196  $2.23$ ,  $P < 0.0001$ ). Thus, there is evidence to suggest that additional regulatory regions relevant to  
197 placental biology are present in the candidate set.

198

### 199 **Predicted placental enhancers expand previously published placental enhancer datasets**

200 We further compared our placental enhancer predictions to a recently published set of 2,216  
201 computationally predicted placental enhancers [17]. These candidates were identified by identifying TFs  
202 implicated in placental and trophoblast function by GREAT and then predicting enhancer activity based  
203 on clustering of TF binding sites (TFBS) in the mouse genome. We will refer to these putative enhancers  
204 as “TFBS clusters.”

205 We calculated the overlap between the TFBS clusters that mapped to human genome and did not  
206 overlap exons or a 5kb region upstream of TSSs (1,044 TFBS clusters) and our high-confidence placental  
207 enhancers. We found 82 elements (20,154 bp) overlapped between the two sets. Because the biological  
208 information used to define enhancers differed between the sets, it is not surprising that our predictions and  
209 the TFBS clusters identify largely distinct regions of the genome.

210 To evaluate the functional relevance of the TFBS clusters, we tested for enriched relevant  
211 functions using GREAT and for enrichment in overlap with preterm birth and gestational age GWAS  
212 regions. We examined the GO biological process terms “placenta development” and “embryonic placental  
213 development” and both were comparably enriched among genes near the TFBS clusters ( $P = 2.95e-15$   
214 and  $P = 2.33e-17$ , respectively) as among our predicted enhancers. The results were similar for  
215 enrichment for pregnancy-related GWAS regions. While 43 of our placental enhancers fell within a  
216 GWAS region associated with preterm birth and gestational age with a calculated fold enrichment of 2.69  
217 ( $P < 0.0001$ ), the TFBS clusters overlapped 13 elements had a fold enrichment of 3.07 ( $P < 0.0006$ ).  
218 Overall, comparing the significant functional annotations of the TFBS clusters with our predicted  
219 placental enhancers revealed similar levels of enrichment for relevant functional terms.

220

### 221 **Placental enhancers are enriched for ancient transposable elements**

222 Transposable elements (TEs) often create regulatory elements in pregnancy-related tissues [24–26]. We  
223 calculated the enrichment of the FANTOM placental enhancers as well as both predicted sets for overlap  
224 with TEs. Overall, as expected due to the silencing of TEs across the genome, each set is significantly  
225 depleted of TEs ( $P < 0.001$ , randomization test) compared to the genomic expectation. However, the age  
226 distribution of TEs present in the placental enhancers compared to TEs overlapped by permuted enhancer  
227 sets is significantly enriched for TEs originating in the common ancestor of theria or before (Fig 5;  $P <$   
228  $0.001$ , randomization test). The enrichment for ancient TEs and depletion of more recent TEs is a  
229 common pattern across validated enhancers [27], and thus the similar observation across our predicted  
230 enhancers lends support to their enhancer activity.

231

232

233

234

235

236 **Fig 5: Validated and predicted placental enhancers are enriched for ancient transposable elements.**

237 We computed the enrichment for overlap of transposable elements (TEs) with origins on different  
238 lineages for experimentally validated and predicted enhancer sets. The enrichment was computed in  
239 reference to the mean of the genome-wide overlap observed in 1,000 (predicted) or 10,000 (FANTOM5)  
240 permuted enhancer sets. The  $\log_2$  of the relative change is given for each comparison. Asterisks indicate  
241 significant enrichment ( $P < 0.05$ , randomization test). Empty gray boxes indicate there were not enough  
242 enhancers to test for enrichment.

243

244 **DISCUSSION**

245 Using an established machine learning framework, we identified 4,562 high-confidence placental  
246 enhancers, as well as an expanded set of 33,010 candidate placental enhancers. These putative regulatory  
247 regions are enriched near genes relevant to pregnancy, are enriched for overlap with variants associated  
248 with diseases of pregnancy, and have similar transposable element profiles as validated enhancers. In  
249 addition, the predicted enhancers significantly expand previously published sets of placental enhancers,  
250 and thus provide greater power to interpret genetic associations with diseases influenced by the placenta.  
251 For example, the fact that 12 out of 14 regions associated pregnancy complications in a recent GWAS are  
252 in high linkage disequilibrium with a predicted enhancer underscores the utility of these genome-wide  
253 enhancer maps. These candidates suggest targeted regions for testing when seeking the causal variants in  
254 these regions and dissecting how they influence pregnancy. More accurate interpretation of these and  
255 future GWAS hits is necessary for understanding the complex biology of pregnancy and eventually  
256 improving the identification and prevention of disorders such as preterm birth. To facilitate the use of our  
257 enhancer maps, they are now integrated into the GENEStATION web platform for studying pregnancy  
258 and preterm birth [19].

259 Our predicted enhancer maps can be improved in several dimensions. First, they are undoubtedly  
260 incomplete. Enhancer activity is highly context and stimulus dependent. Due to the paucity of training  
261 data from diverse contexts, we have focused on identifying a set of candidate regions that have hallmarks  
262 of potential regulatory activity in the placenta broadly without making specific contextual predictions.  
263 Furthermore, the patterns learned by our machine learning classifier generalize existing patterns in the  
264 evolution, sequence, and functional genomics of known placental enhancers, but are constrained by what  
265 is currently known. Finally, there is heterogeneity in the cellular makeup of the placenta and existing data  
266 do not enable cell-specific predictions. As more enhancer data become available from relevant cellular  
267 contexts, we will continue to refine our predictions and integrate them with other annotations.

268 While the costs and technical difficulties of agnostically identifying enhancers are decreasing,  
269 many tissues and cell types remain difficult to assay due to biological constraints and ethical  
270 considerations. These challenges are compounded for tissues like the placenta that are rapidly evolving

271 between species, limiting the utility of information garnered through the study of model organisms.  
272 Computational approaches, such as those presented here, paired with growing collections of  
273 experimentally validated regulatory regions provide a promising avenue for enabling researchers to  
274 interrogate the gene regulatory architecture of the placenta and other tissues that are difficult to assay.

275

276

## 277 **METHODS**

### 278 **Genome-wide placental enhancer predictions.**

279 We based our approach on the EnhancerFinder two-step machine learning algorithm for predicting  
280 enhancers and their tissues of activity. We first trained an SVM classifier based on diverse sequence,  
281 evolutionary, and functional genomics features to distinguish known enhancers active in a range of tissues  
282 from the genomic background. Then in the second step, additional classifiers were trained to distinguish  
283 enhancers active in different tissues from one another. In this step, all enhancers active in a tissue of  
284 interest (placenta) are used as positive training examples and all enhancers not active in the tissue are  
285 treated as negatives.

286

287 **Training regions.** We downloaded the hg19 genomic locations of all 38,538 robust human enhancers  
288 identified by CAGE from the FANTOM5 Transcribed Enhancer Atlas. The data included 748 human  
289 placental enhancers. The average length of a FANTOM5 placental enhancer is 400 bp.

290 To train the enhancer classifier (step 1), the positive set consisted of a random subset of 385  
291 robust human enhancers (fixed to a length of 400 bp at the center of any enhancer). Our negative set  
292 consisted of 2,000 random genomic regions matched to the length and chromosome distribution of the  
293 positive set and excluding FANTOM5 enhancers and hg19 genome assembly gaps. The random genomic  
294 regions were generated using shuffleBed [28]. To train the placental enhancer classifier (step 2), we used  
295 the 748 human placental enhancers (fixed at a length of 400 bp from each enhancer center) as positives.  
296 The negative set consisted of a random subset of 2,000 robust human enhancers, excluding placental  
297 enhancers. All analyses in this paper were performed in reference to the UCSC Genome Browser  
298 February 2009 assembly of the human genome (GRCh37/hg19). Any dataset not in this build was  
299 mapped over to hg19 coordinates using the liftOver tool from the UCSC Kent tools with default  
300 parameters [29].

301

302 **Feature data.** Three types of data were used as features in the MKL algorithm: functional genomics,  
303 evolutionary conservation, and DNA sequence motifs. Each type of data was assigned to its own kernel.  
304 Following the approach used in previous applications of EnhancerFinder [16], we used linear kernels,



305 consisting of computed dot products of feature vectors, for the functional genomics and evolutionary  
306 conservation data. For the DNA sequence-based features we used a 5-spectrum kernel. The MKL  
307 algorithm combines the three kernels by learning weights to assign to each kernel from the training set  
308 [16].

309 For the functional genomics kernel, we obtained 980 histone modification datasets (H3K27ac,  
310 H3K4me1, H3K4me4, etc.) and 39 DNase datasets from 128 cellular contexts in the Human Epigenome  
311 Atlas [22], as well as H3K27ac, H3K4me3, and DNaseI peaks identified in decidualized endometrial  
312 stromal cells from Lynch *et al* [24]. Feature vectors were constructed by overlapping genomic regions in  
313 the training set with each functional genomics dataset. Each region was associated with a binary vector  
314 that represented the presence or absence of overlap with each feature dataset. We took evolutionary  
315 conservation scores from the UCSC Genome Browser phastConsElements46way tracks for placental  
316 mammals, primates, and vertebrates. Each genomic region was assigned the highest conservation score of  
317 any overlapping phastCons element. Genomic regions not overlapping a phastCons element were  
318 assigned a score of zero. To quantify the DNA sequence of a region of interest, we counted the  
319 occurrence of all possible length 5 bp DNA sequence motifs (5-mers) within genomic regions of interest.

320  
321 ***Classifier training and prediction.*** All classifiers were trained using the Multiple Kernel Learning (MKL)  
322 functionalities of the SHOGUN Machine Learning Toolbox [30]. The algorithm uses features of the  
323 training set to learn a linear function that separates positives from negatives. Genomic regions can then be  
324 assigned a score based on their position relative to the separating hyperplane learned by the SVM. A  
325 positive score indicates that the region belongs to the positive set, while a negative score indicates  
326 membership in the negative set. The magnitude of the score indicates the confidence the algorithm places  
327 on its prediction. Only regions that are predicted to be positives by both classifiers are considered  
328 candidate placental enhancers.

329  
330 ***Classifier evaluation.*** We evaluated the performance of our trained classifiers using 10-fold cross  
331 validation and computing ROC curves and precision-recall (PR) curves averaged over folds. In a 10-fold  
332 cross validation, the training data are partitioned into 10 equal subsets, and the classifier is trained 10  
333 times. Each time, only 9 of the 10 subsets are used to train the classifier. The trained classifier is then  
334 applied to the held-out subset and evaluated based on the true status of these regions. The performance of  
335 the classifier is then quantified using ROC AUC and a PR AUC.

336  
337 ***Interpreting Algorithm Weights for the Functional Genomics Kernel.*** Based on positive and negative  
338 training data, our algorithm reports the kernel and feature weights learned during training. The total

339 kernel weight is computed along with the weight for each individual feature weight within that kernel.  
340 Positive values are assigned to features associated with the positive input set and features associated with  
341 the negative input set score more negatively. After training our placental enhancer classifier (Step 2), we  
342 examined the individual weights within its functional genomics kernel to determine whether placenta-  
343 related histone modifications were weighted higher than histone modifications found in other cellular  
344 contexts. In this case, positive weights are associated with placental enhancer activity and negative  
345 weights are associated with enhancer activity in other cellular contexts.

346

347 ***Genome-wide Placental Enhancer Prediction.*** To predict placental enhancers genome-wide, we tiled  
348 each autosome into 400 bp regions (the average length of a FANTOM placental enhancer) in overlapping  
349 increments of 200 bp. We omitted the sex chromosomes from our analyses. These regions were filtered to  
350 remove any tiles that overlapped an exon or fell within 5 kb of a transcription start site (TSS) to minimize  
351 association with promoter regions. Coordinates for exons and TSSs were downloaded from the Ensembl  
352 GRCh37 Feb 2014 [31] using the Biomart archive. We applied the trained enhancer and placental  
353 enhancer classifiers to all remaining tiles. We merged all overlapping regions that received scores greater  
354 than zero from both the enhancer and placental enhancer classifiers. The resulting 33,010 merged regions  
355 are our candidate placental enhancer set. To obtain a refined list of predicted regions, we fixed a  
356 minimum threshold score of greater than one from both of our trained classifiers. After merging  
357 overlapping regions that met our criteria, a subset of 4,562 candidate placental enhancers remained and  
358 became our high-confidence placental enhancer set.

359

### 360 **Analysis of genome-wide placental enhancer predictions**

361 ***Gene ontology annotation enrichment.*** To identify the functional annotations, phenotypes, and pathways  
362 enriched among genes nearby the predicted placental enhancers, we used GREAT with the default  
363 settings. GREAT is a web tool that takes a set of genomic regions and associates them with their putative  
364 target genes and target gene annotations [23]. GREAT calculates the enrichment of annotations within the  
365 input regions and returns the terms that are significantly enriched near the input regions. We submitted  
366 our candidate placental enhancer set as well as our high confidence placental enhancer set to GREAT,  
367 using the default entire human genome as the background.

368

369 ***Enrichment for regions relevant to pregnancy.*** We calculated the enrichment for GWAS SNPs in our  
370 candidate placental enhancer set and high-confidence placental enhancer set. We obtained 14 preterm  
371 birth and gestational age GWAS regions (omitting 3 regions on the X chromosome) from a recent GWAS  
372 [9]. For each set of enrichment analyses, we generated 10,000 sets of random genomic regions that were

373 matched to the predicted enhancer set based on the length and chromosome distribution. Then, we  
374 computed the overlap of each of the 10,000 random region sets with each set of regions of interest.  
375 Enrichment was calculated by dividing the overlap of our predicted set with the mean overlap of the  
376 10,000 randomly generated sets, and an empirical p-value was obtained by counting the number of  
377 random sets for which as much or more overlap with the regions of interest is observed.

378

379 ***Comparison to previous placental enhancer predictions.*** We downloaded a set of 2,216 placental  
380 enhancers defined using transcription factor binding site (TFBS) clusters related to placental function  
381 from supplementary material of Tuteja et. al [17]. Of the 2,216 TFBS clusters whose build was of the  
382 UCSC Genome Browser July 2007 assembly of the mouse genome (NCBI37/mm9), 2,207 TFBS clusters  
383 mapped into hg19 using liftOver [29]. From these TFBS clusters, we generated a subset of 1,044 regions  
384 by filtering out regions overlapping exons and regions within 5 kb of a transcription start site (TSS). The  
385 motivation for generating a smaller subset of TFBS clusters comes from our concern that predicted  
386 placental enhancers defined by TFBSs nearby TSSs may have an increased chance of being associated  
387 with promoters rather than enhancers. All enrichment tests were calculated on both the larger and smaller  
388 subset of TFBS clusters. Both sets of TFBS clusters had comparable enrichments. We report them for the  
389 smaller set that is more comparable to our enhancer sets here.

390

391 ***Transposable element enrichment analysis.*** TE genomic locations were retrieved from RepeatMasker  
392 v4.0.5 [32]. The clades in which each TE is present were taken from Dfam v1.4 [33]. In situations where  
393 Dfam provided multiple clades, the clade of the most recent common ancestor was designated as the  
394 origin. We collapsed all TEs originating in the last common ancestor of amniota or before into one  
395 category.

396 For both the FANTOM5 placental enhancers and the high-confidence predicted placental  
397 enhancers, we used shuffleBed [28] to shuffle enhancer regions around the genome. We constrained the  
398 shuffled regions to the chromosome of the corresponding observed region and did not allow shuffled  
399 regions overlap one another, gaps in the genome assembly, or ENCODE blacklist regions [34]. For the  
400 FANTOM5 enhancers, we created 10,000 sets of shuffled regions. For the predicted enhancers, we  
401 created 1,000 sets of shuffled regions separately for the high-confidence and candidate sets. We  
402 calculated the permutation-based p-value for each lineage of origin for all TEs by calculating the number  
403 of permuted sets that overlapped more or the same amount of TEs appearing on a given lineage. Tests  
404 were only performed if at least 10 enhancers overlapped a TE of the given lineage.

405

406

407 **ACKNOWLEDGMENTS**

408 We thank members of the Capra and Rokas Labs for helpful discussions. We thank Ge Zhang for sharing  
409 information on the gestational age and preterm birth GWAS. This work was supported by NIH grants  
410 R01GM115836 and R35GM127087 to JAC, an Innovation Catalyst Award from the March of Dimes  
411 Ohio Collaborative to JAC, and a Burroughs Wellcome Fund Preterm Birth Initiative Award to JAC. JZ  
412 was supported by a Vanderbilt Undergraduate Summer Research Program (VUSRP) Fellowship.  
413

414 **REFERENCES**

- 415
- 416 1. Cross JC, Werb Z, Fisher SJ. Implantation and the placenta: key pieces of the development puzzle.  
417 Science. 1994;266: 1508–1518. doi:10.1126/science.7985020
- 418 2. Morgan TK. Placental Insufficiency Is a Leading Cause of Preterm Labor. *Neoreviews*. 2014;15:  
419 e518–e525. doi:10.1542/neo.15-12-e518
- 420 3. Kovo M, Schreiber L, Ben-Haroush A, Asalee L, Seadia S, Golan A, et al. The placental factor in  
421 spontaneous preterm labor with and without premature rupture of membranes. *J Perinat Med*.  
422 2011;39: 423–429. doi:10.1515/JPM.2011.038
- 423 4. Faye-Petersen OM. The placenta in preterm birth. *J Clin Pathol*. 2008;61: 1261–1275.  
424 doi:10.1136/jcp.2008.055244
- 425 5. Williams PJ, Broughton Pipkin F. The genetics of pre-eclampsia and other hypertensive disorders  
426 of pregnancy. *Best Pract Res Clin Obstet Gynaecol*. Elsevier; 2011;25: 405–417.  
427 doi:10.1016/j.bpobgyn.2011.02.007
- 428 6. Wu W, Witherspoon DJ, Fraser A, Clark EAS, Rogers A, Stoddard GJ, et al. The heritability of  
429 gestational age in a two-million member cohort: Implications for spontaneous preterm birth. *Hum*  
430 *Genet*. 2015;134: 803–808. doi:10.1007/s00439-015-1558-1
- 431 7. Swaggart KA, Pavlicev M, Muglia LJ. Genomics of preterm birth. *Cold Spring Harb Perspect*  
432 *Med*. Cold Spring Harbor Laboratory Press; 2015;5: a023127. doi:10.1101/cshperspect.a023127
- 433 8. Monangi NK, Brockway HM, House M, Zhang G, Muglia LJ. The genetics of preterm birth:  
434 Progress and promise. *Seminars in Perinatology*. 2015. pp. 574–583.  
435 doi:10.1053/j.semperi.2015.09.005
- 436 9. Zhang G, Feenstra B, Bacelis J, Liu X, Muglia LM, Juodakis J, et al. Genetic Associations with  
437 Gestational Duration and Spontaneous Preterm Birth. *N Engl J Med*. 2017; NEJMoal612665.  
438 doi:10.1056/NEJMoal612665
- 439 10. Lettice LA, Heaney SJH, Purdie LA, Li L, de Beer P, Oostra BA, et al. A long-range Shh enhancer  
440 regulates expression in the developing limb and fin and is associated with preaxial polydactyly.  
441 *Hum Mol Genet*. 2003;12: 1725–1735. doi:10.1093/hmg/ddg180
- 442 11. Maurano MT, Humbert R, Rynes E, Thurman RE, Haugen E, Wang H, et al. Systematic  
443 Localization of Common Disease-Associated Variation in Regulatory DNA. *Science* (80- ).  
444 2012;337: 1190–1195. doi:10.1126/science.1222794
- 445 12. Bauer DE, Kamran SC, Lessard S, Xu J, Fujiwara Y, Lin C, et al. An Erythroid Enhancer of  
446 BCL11A Subject to Genetic Variation Determines Fetal Hemoglobin Level. *Science* (80- ).  
447 2013;342: 253–257.
- 448 13. Musunuru K, Strong A, Frank-Kamenetsky M, Lee NE, Ahfeldt T, Sachs K V, et al. From  
449 noncoding variant to phenotype via SORT1 at the 1p13 cholesterol locus. *Nature*. 2010;466: 714–  
450 9. doi:10.1038/nature09266
- 451 14. Simonazzi G, Curti A, Farina A, Pilu G, Bovicelli L, Rizzo N. Amniocentesis and chorionic villus  
452 sampling in twin gestations: which is the best sampling technique? *Am J Obstet Gynecol*.  
453 2010;202. doi:10.1016/j.ajog.2009.11.016
- 454 15. Ratajczak CK, Fay JC, Muglia LJ. Preventing preterm birth: the past limitations and new potential  
455 of animal models. *Dis Model Mech*. 2010;3: 407–414. doi:10.1242/dmm.001701

- 456 16. Erwin GD, Oksenberg N, Truty RM, Kostka D, Murphy KK, Ahituv N, et al. Integrating diverse  
457 datasets improves developmental enhancer prediction. *PLoS Comput Biol.* 2014;10: e1003677.  
458 doi:10.1371/journal.pcbi.1003677
- 459 17. Tuteja G, Moreira KB, Chung T, Chen J, Wenger AM, Bejerano G. Automated Discovery of  
460 Tissue-Targeting Enhancers and Transcription Factors from Binding Motif and Gene Function  
461 Data. *PLoS Comput Biol.* 2014;10. doi:10.1371/journal.pcbi.1003449
- 462 18. Zhou J, Troyanskaya OG. Predicting effects of noncoding variants with deep learning-based  
463 sequence model. *Nat Methods.* 2015;12: 931–4. doi:10.1038/nmeth.3547
- 464 19. Kim M, Cooper BA, Venkat R, Phillips JB, Eidem HR, Hirbo J, et al. GENE-STATION 1.0: a  
465 synthetic resource of diverse evolutionary and functional genomic data for studying the evolution  
466 of pregnancy-associated tissues and phenotypes. *Nucleic Acids Res.* Oxford University Press;  
467 2015;44: D908--D916.
- 468 20. Andersson R, Gebhard C, Miguel-Escalada I, Hoof I, Bornholdt J, Boyd M, et al. An atlas of  
469 active enhancers across human cell types and tissues. *Nature.* 2014;507: 455–61.  
470 doi:10.1038/nature12787
- 471 21. Siepel A, Bejerano G, Pedersen JS, Hinrichs AS, Hou M, Rosenbloom K, et al. Evolutionarily  
472 conserved elements in vertebrate, insect, worm, and yeast genomes. *Genome Res.* 2005;15: 1034–  
473 1050. doi:10.1101/gr.3715005
- 474 22. Consortium RE, Kundaje A, Meuleman W, Ernst J, Bilenky M, Yen A, et al. Integrative analysis  
475 of 111 reference human epigenomes. *Nature.* 2015;518: 317–330. doi:10.1038/nature14248
- 476 23. McLean CY, Bristor D, Hiller M, Clarke SL, Schaar BT, Lowe CB, et al. GREAT improves  
477 functional interpretation of cis-regulatory regions. *Nat Biotechnol.* Nature Publishing Group;  
478 2010;28: 495–501. doi:10.1038/nbt.1630
- 479 24. Lynch VJ, Nnamani MC, Kapusta A, Brayer K, Plaza SL, Mazur EC, et al. Ancient transposable  
480 elements transformed the uterine regulatory landscape and transcriptome during the evolution of  
481 mammalian pregnancy. *Cell Rep.* 2015;10: 551–61. doi:10.1016/j.celrep.2014.12.052
- 482 25. Emera D, Wagner GP. Transposable element recruitments in the mammalian placenta: Impacts  
483 and mechanisms. *Brief Funct Genomics.* 2012;11: 267–276. doi:10.1093/bfgp/els013
- 484 26. Lynch VJ, Leclerc RD, May G, Wagner GP. Transposon-mediated rewiring of gene regulatory  
485 networks contributed to the evolution of pregnancy in mammals. *Nat Genet.* 2011;43: 1154–9.  
486 doi:10.1038/ng.917
- 487 27. Simonti CN, Pavličev M, Capra JA. Transposable element exaptation into regulatory regions is  
488 rare, influenced by evolutionary age, and subject to pleiotropic constraints. *Mol Biol Evol.* Oxford  
489 University Press; 2017;34: 2856–2869.
- 490 28. Quinlan AR, Hall IM. BEDTools: a flexible suite of utilities for comparing genomic features.  
491 *Bioinformatics.* 2010;26: 841–842. doi:10.1093/bioinformatics/btq033
- 492 29. Kent WJ, Sugnet CW, Furey TS, Roskin KM, Pringle TH, Zahler AM, et al. The human genome  
493 browser at UCSC. *Genome Res.* Cold Spring Harbor Laboratory Press; 2002;12: 996–1006.  
494 doi:10.1101/gr.229102. Article published online before print in May 2002
- 495 30. shogun-toolbox/shogun: Shogun 5.0.0 - Ōtomo no Yakamochi. doi:10.5281/zenodo.164882
- 496 31. Flicek P, Amode MR, Barrell D, Beal K, Billis K, Brent S, et al. Ensembl 2014. *Nucleic Acids*

- 497 Res. 2014;42: 749–755. doi:10.1093/nar/gkt1196
- 498 32. Smit A, Hubley R, Green P. RepeatMasker Open-4.0 [Internet].
- 499 33. Wheeler TJ, Clements J, Eddy SR, Hubley R, Jones TA, Jurka J, et al. Dfam: a database of  
500 repetitive DNA based on profile hidden Markov models. *Nucleic Acids Res.* 2013;41: D70-82.  
501 doi:10.1093/nar/gks1265
- 502 34. Bernstein BE, Birney E, Dunham I, Green ED, Gunter C, Snyder M. An integrated encyclopedia  
503 of DNA elements in the human genome. *Nature.* 2012;489: 57–74. doi:10.1038/nature11247
- 504

# Training and evaluation

## 1. Associate enhancer (+) and non-enhancer (-) set to genomic features

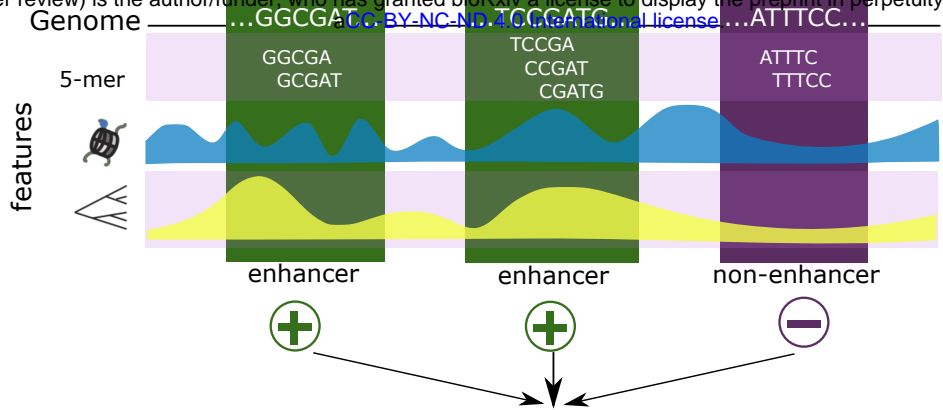

## 2. Train and evaluate classifier to distinguish enhancers and non-enhancers based on genomic features

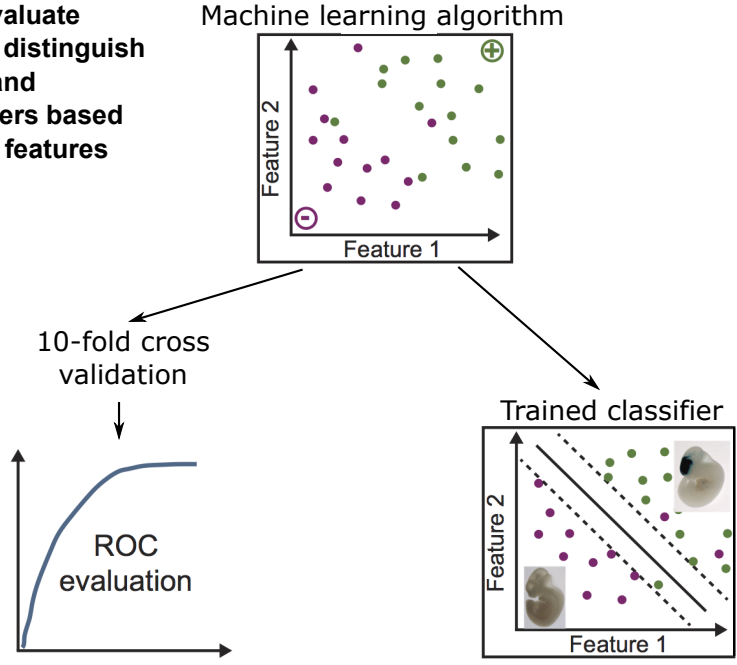

# Application

## 3. Apply trained classifier to genomic regions of interest

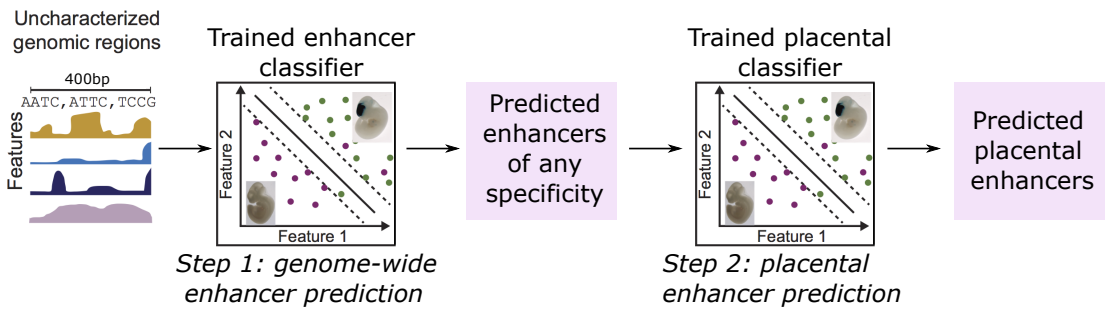



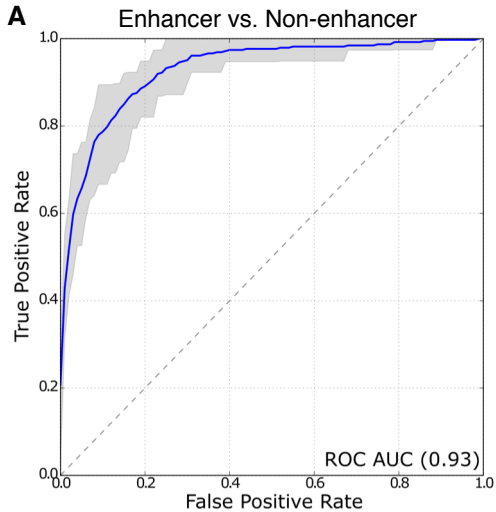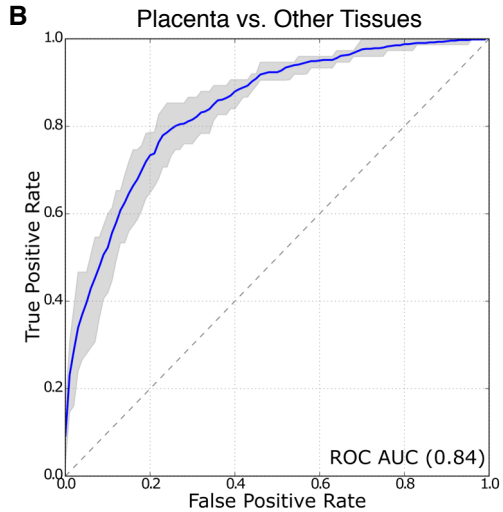

Contexts Ordered by Mean |Weight|

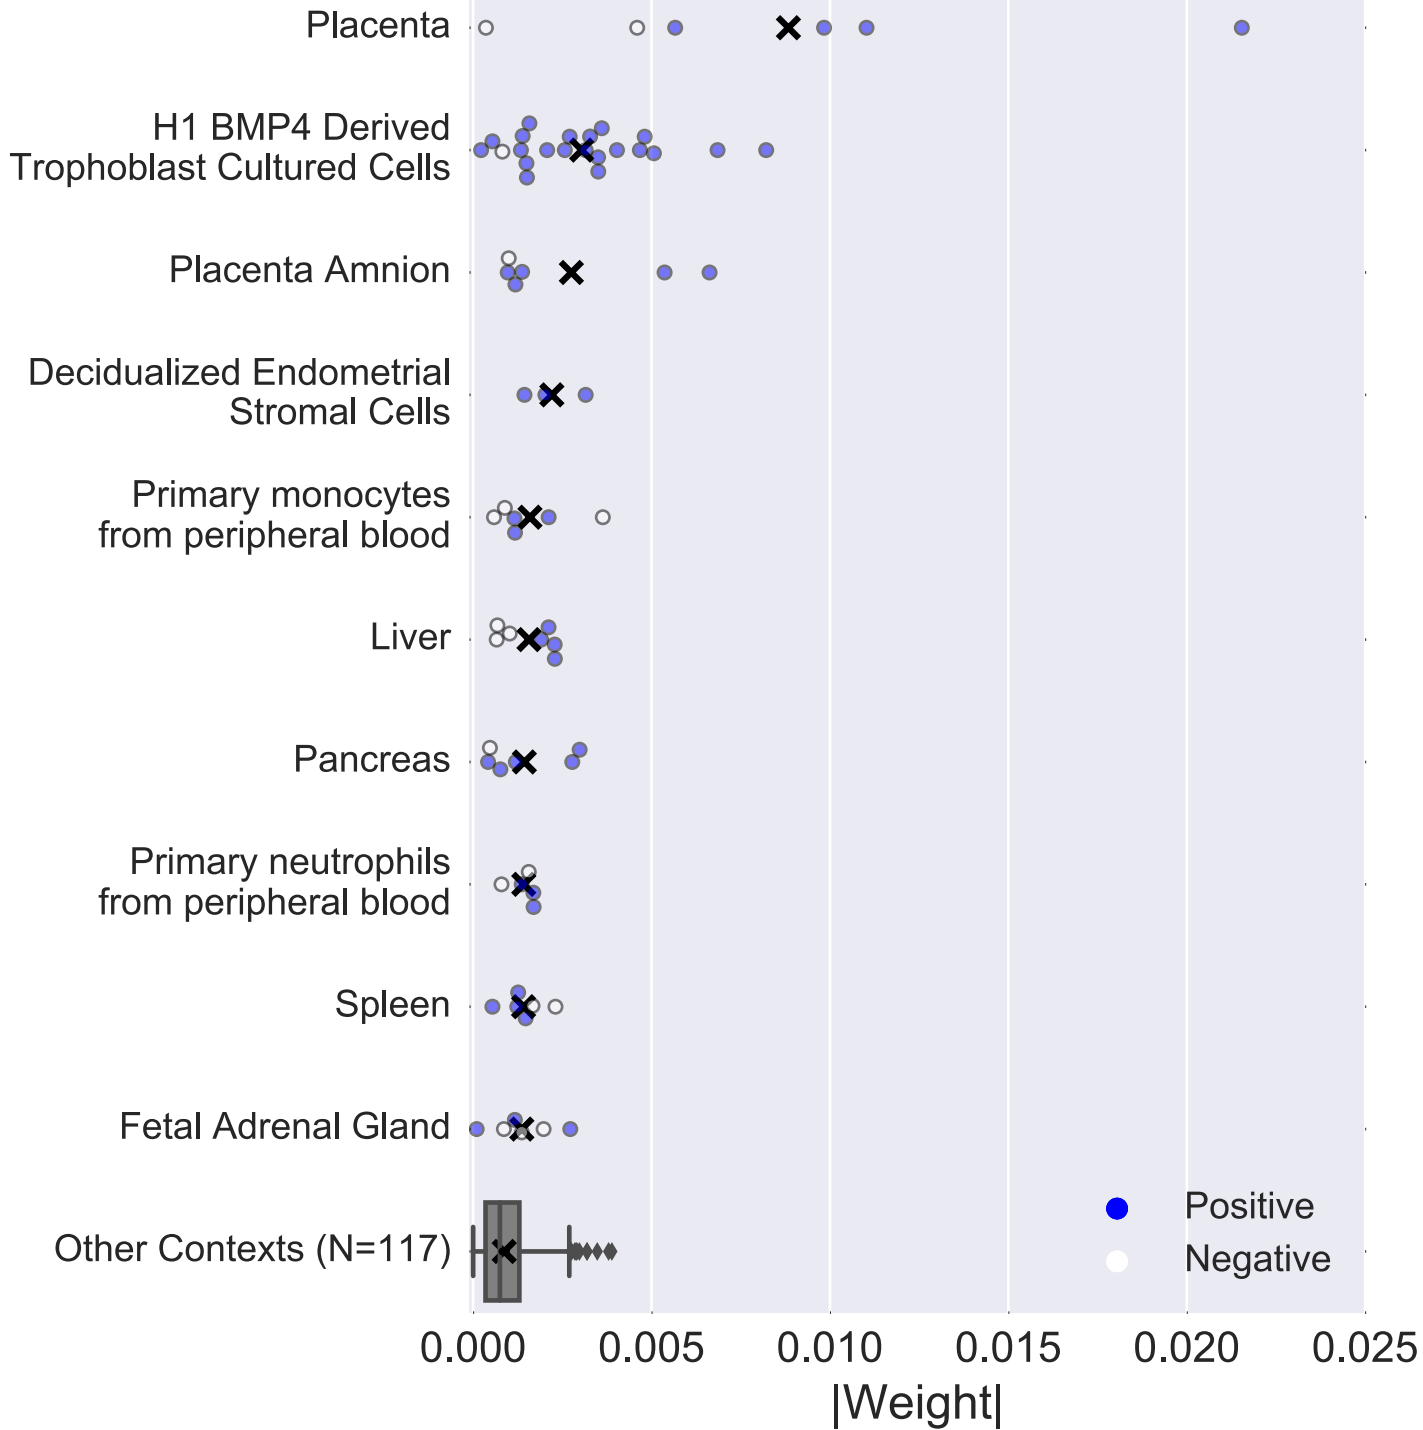

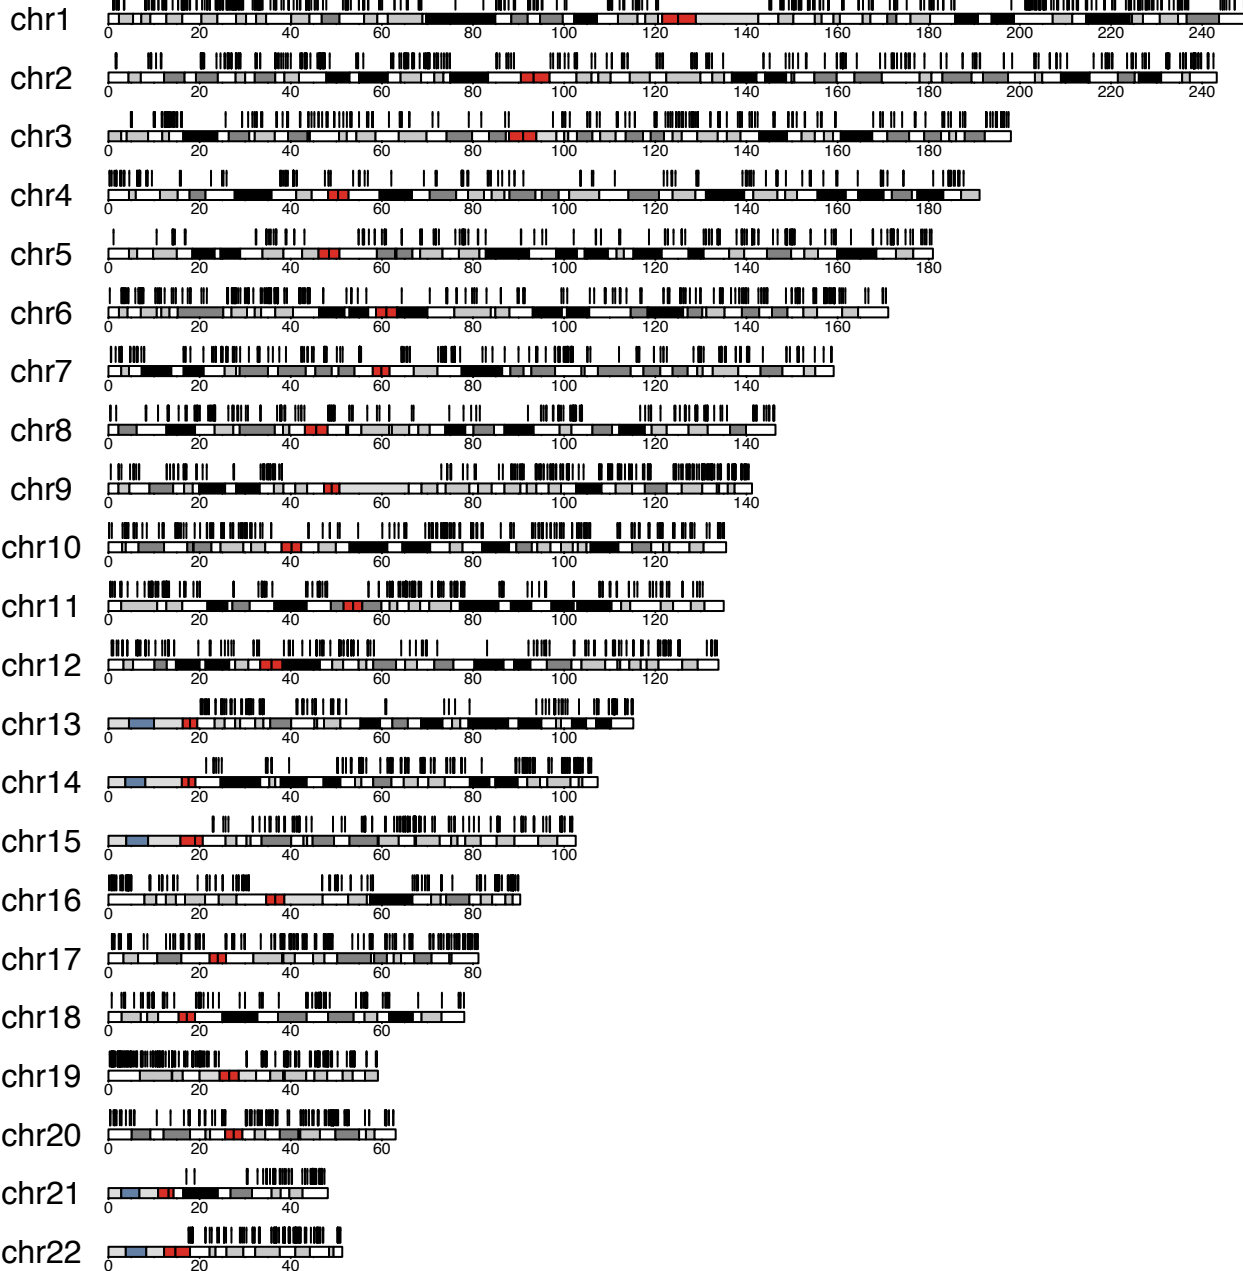

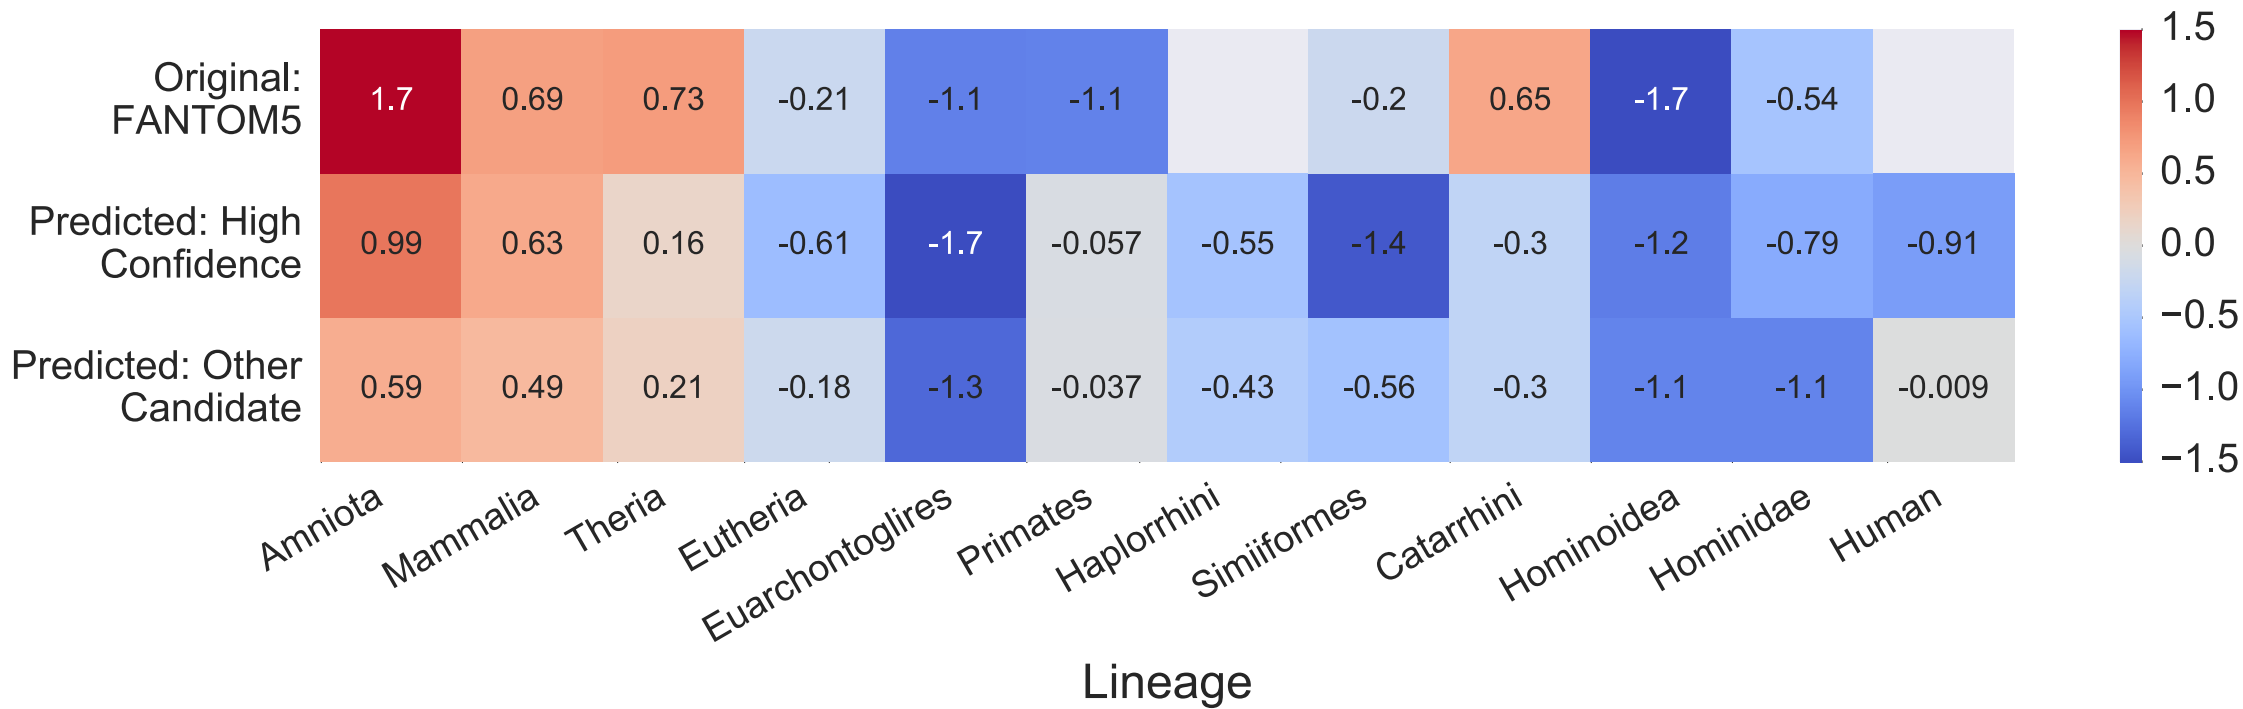

Source: https://www.biorxiv.org/content/10.1101/364026v1.full.pdf
